# Supplementary material for: Ataxin-1 regulates epithelial–mesenchymal transition of cervical cancer cells
Source: Oncotarget. 2017 Feb 14;8(11):18248–59. doi: 10.18632/oncotarget.15319 (PMC5392324; doi:10.18632/oncotarget.15319)
Supplement: Supplementary file 1 [file oncotarget-08-18248-s001.pdf]

## Ataxin-1 regulates epithelial–mesenchymal transition of cervical cancer cells

### SUPPLEMENTARY METHODS

For wound-healing assays, HeLa<sup>shATXN1-#1</sup>, HeLa<sup>shATXN1-#2</sup>, and control cells were allowed to adhere to the surfaces of six-well plates. After a pretreatment with mitomycin C (10 µg/ml) in DMEM for 2 h, 10-µl pipette tips were used to introduce longitudinal straight scratches

in the cell layers. After wounding, plates were imaged using a Zeiss inverted microscope equipped with a 5× phase-contrast objective. Representative wound healing images were taken at the time of the scratch and 0–72 h after the wound scratch in stable HeLa cells.

### SUPPLEMENTARY FIGURE

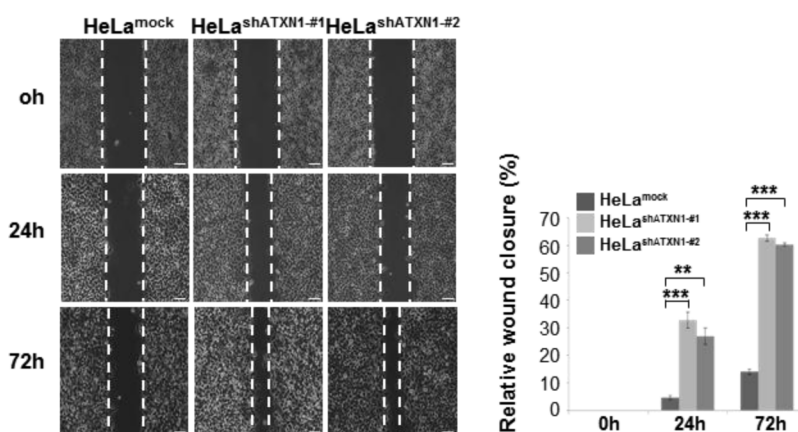

**Supplementary Figure 1: The migration of HeLa<sup>shATXN1-#1</sup>, HeLa<sup>shATXN1-#2</sup>, and control cells was assayed in a wound-healing assay. \*  $P < 0.05$ , \*\*  $P < 0.01$ , \*\*\*  $P < 0.001$ , *t* test. Scale bar: 100 µm.**
